# Supplementary material
Source: PubMed Central journal article supplement (PMC4776093)

Figure e-1. Workflow and design of each study included in the current manuscript.

# Analysis Workflow

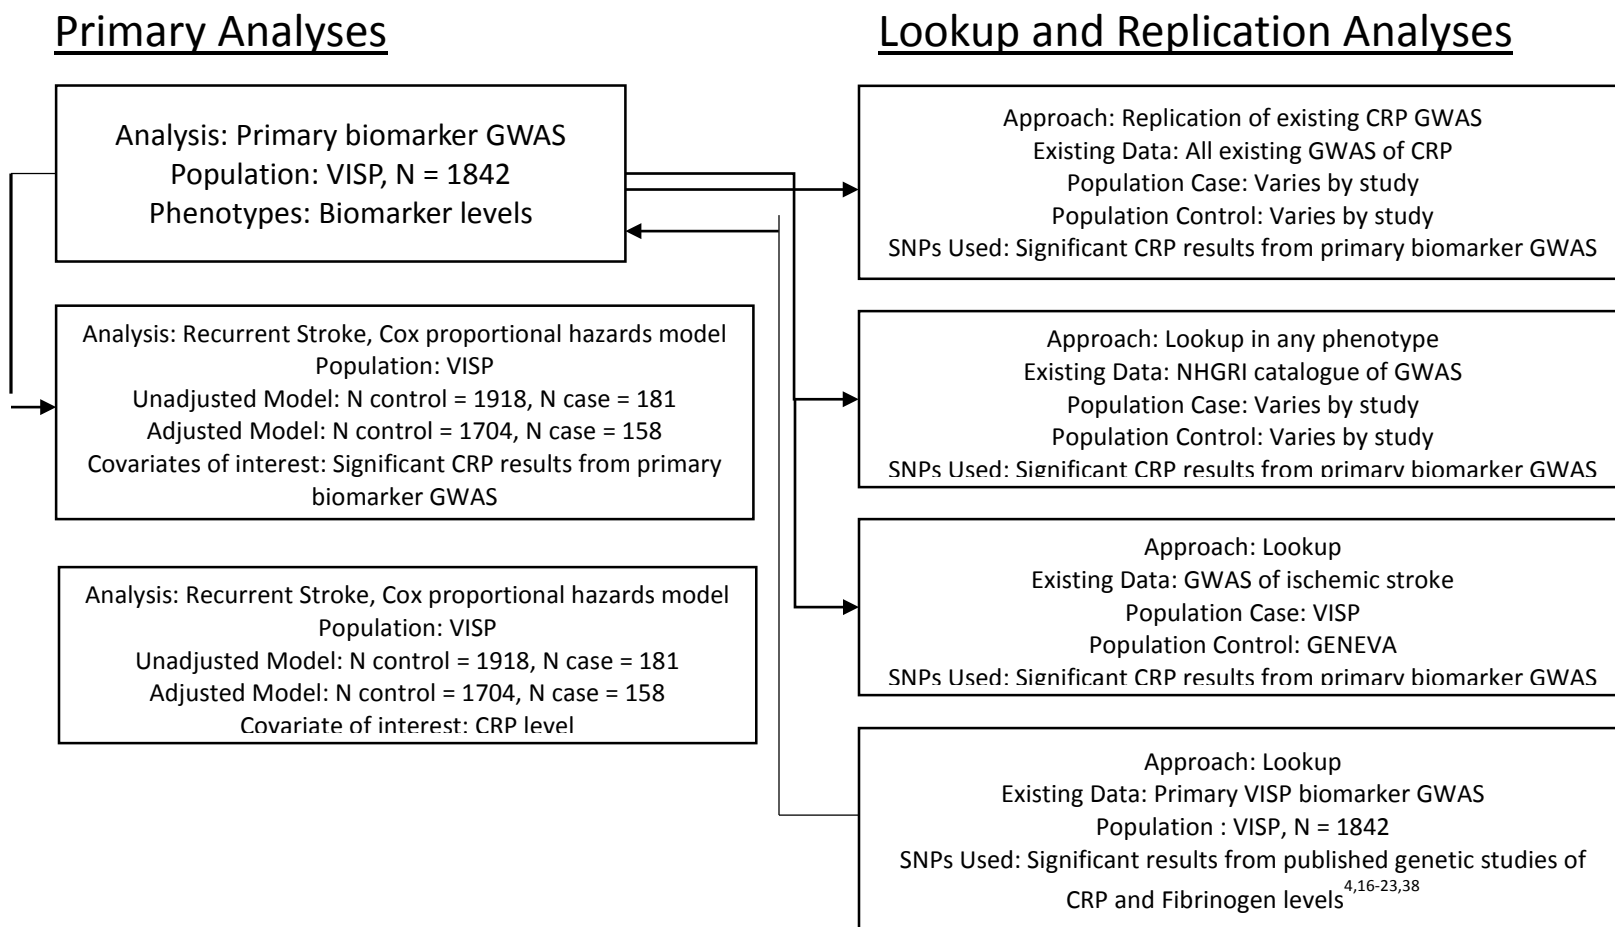

Supplement: supp_WNL.0000000000002319_Figure_e-1.pdf [file supp_WNL.0000000000002319_Figure_e-1.pdf]
