# Supplementary material
Source: PubMed Central journal article supplement (PMC4776093)
Supplement: supp_WNL.0000000000002319_Figure_e-2.pdf [file supp_WNL.0000000000002319_Figure_e-2.pdf]

Figure e-2. Manhattan plots of VISP biomarker genome-wide association studies that did not reach the specified threshold of  $p < 5 \times 10^{-8}$ .

**A**

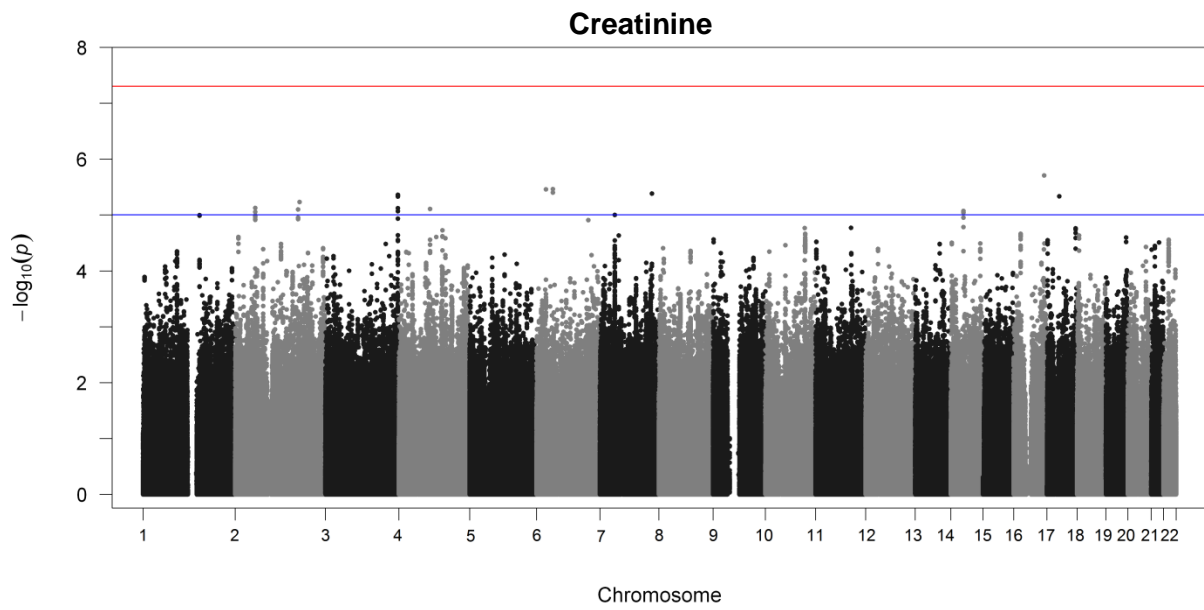

**B**

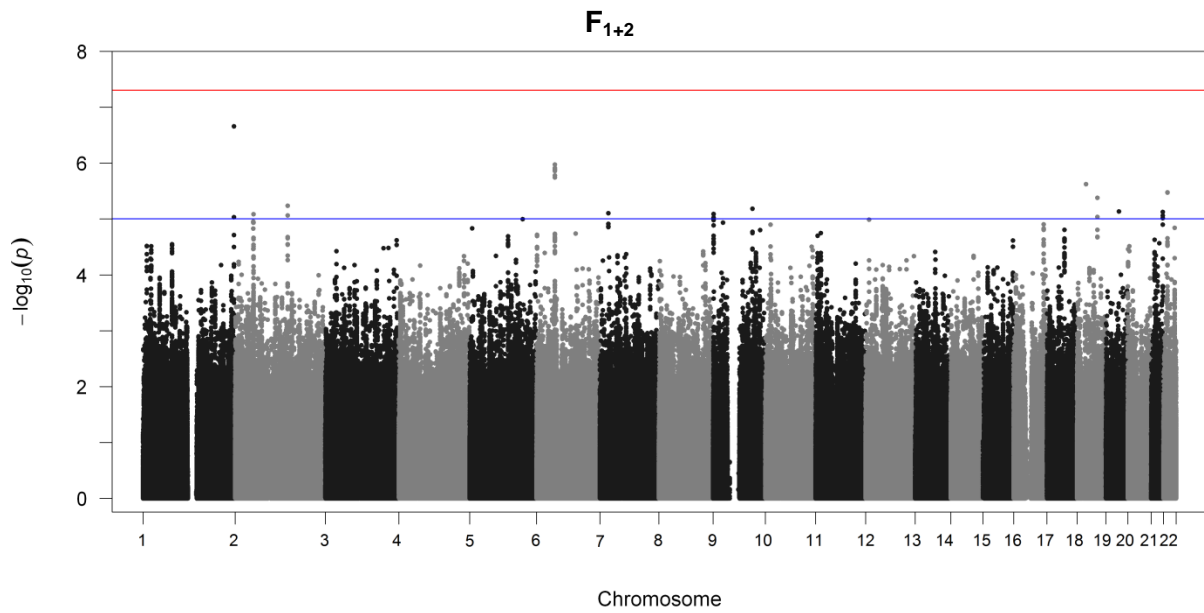

**C**

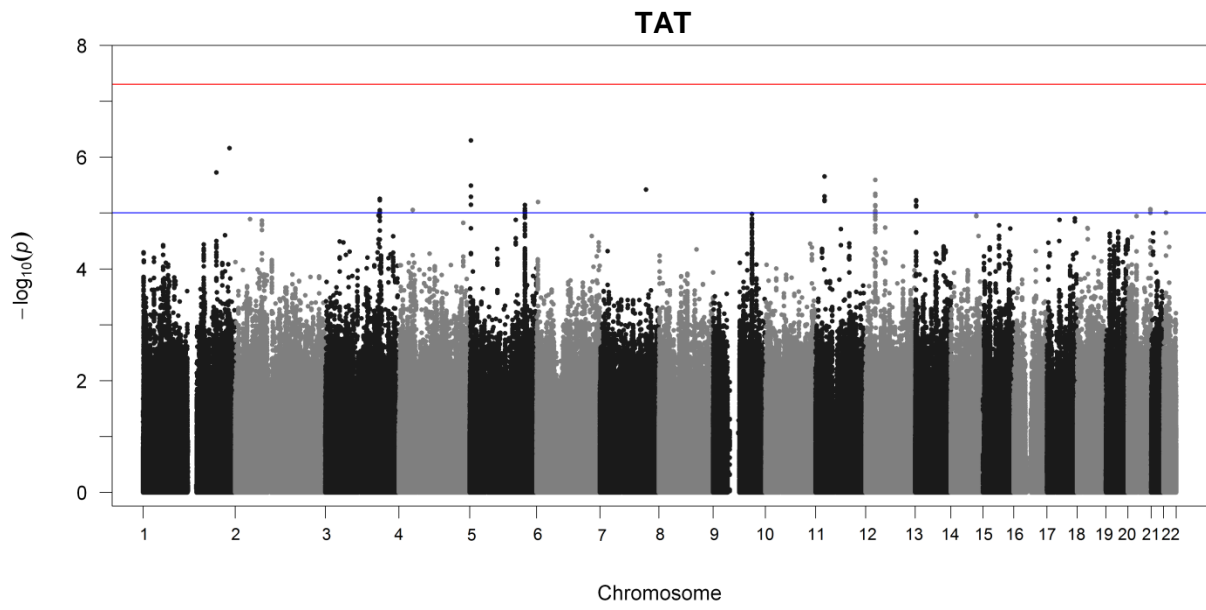

**D**

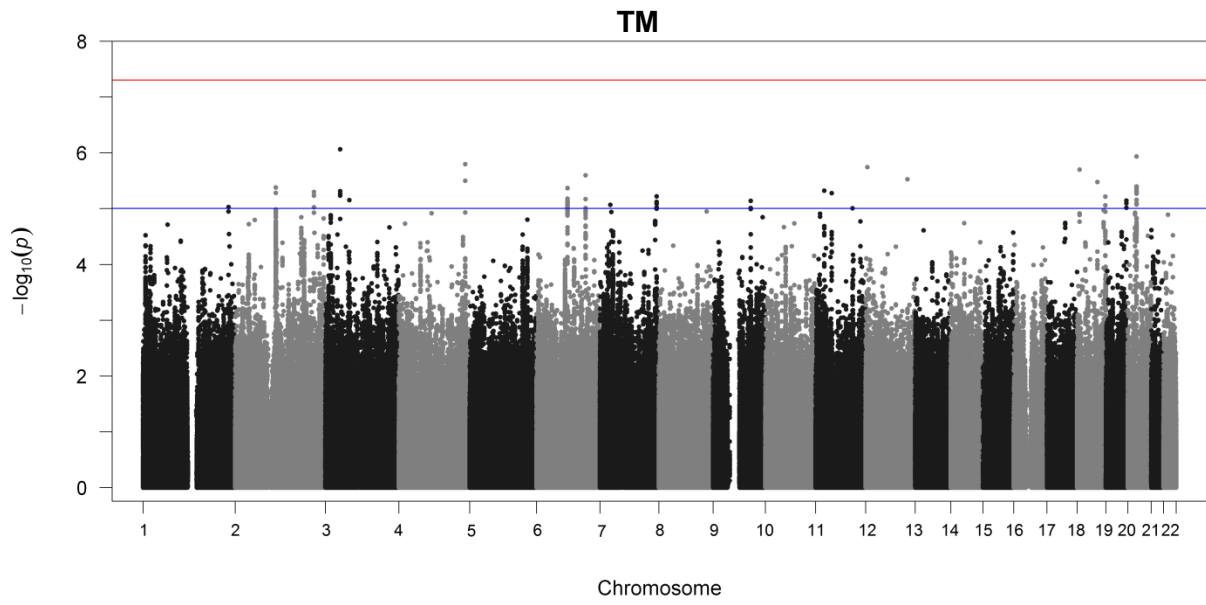

**F**

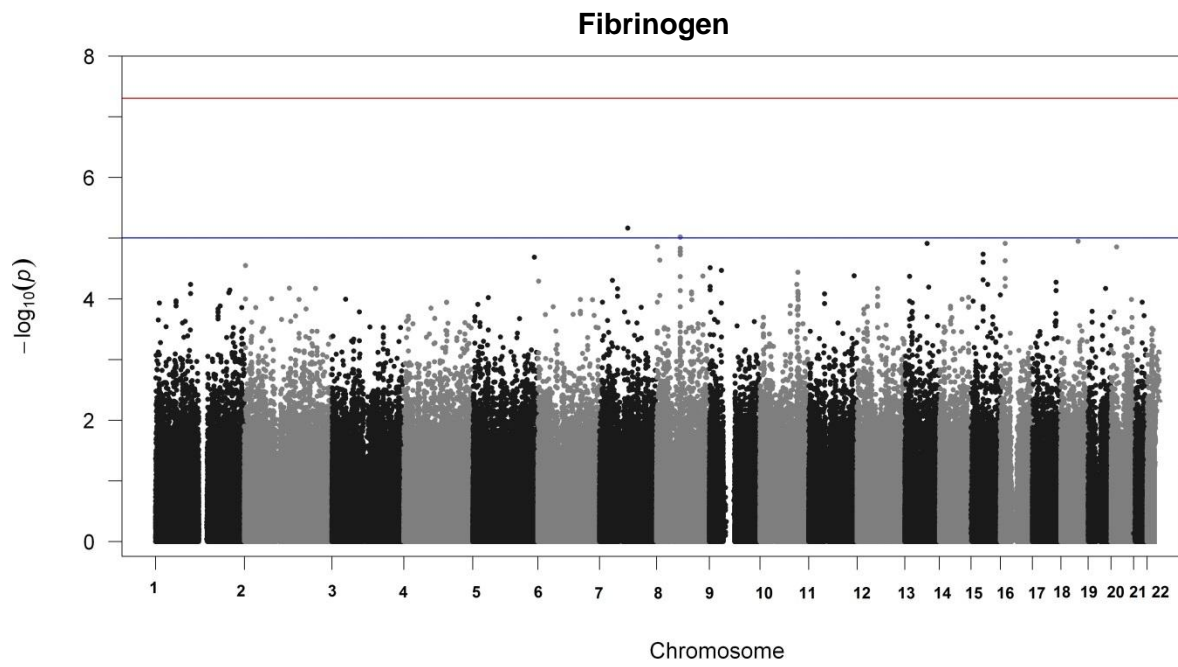

The red line represents a  $-\log_{10}(p)$  of  $5 \times 10^{-8}$  and the blue line represents a  $-\log_{10}(p)$  of  $1 \times 10^{-6}$ . The x-axis represents the analyzed chromosome.
