# Supplementary material
Source: PubMed Central journal article supplement (PMC4776093)
Supplement: supp_WNL.0000000000002319_Figure_e-3.pdf [file supp_WNL.0000000000002319_Figure_e-3.pdf]

Figure e-3. Expression quantitative trait loci (eQTL) analysis of CRP gene expression.

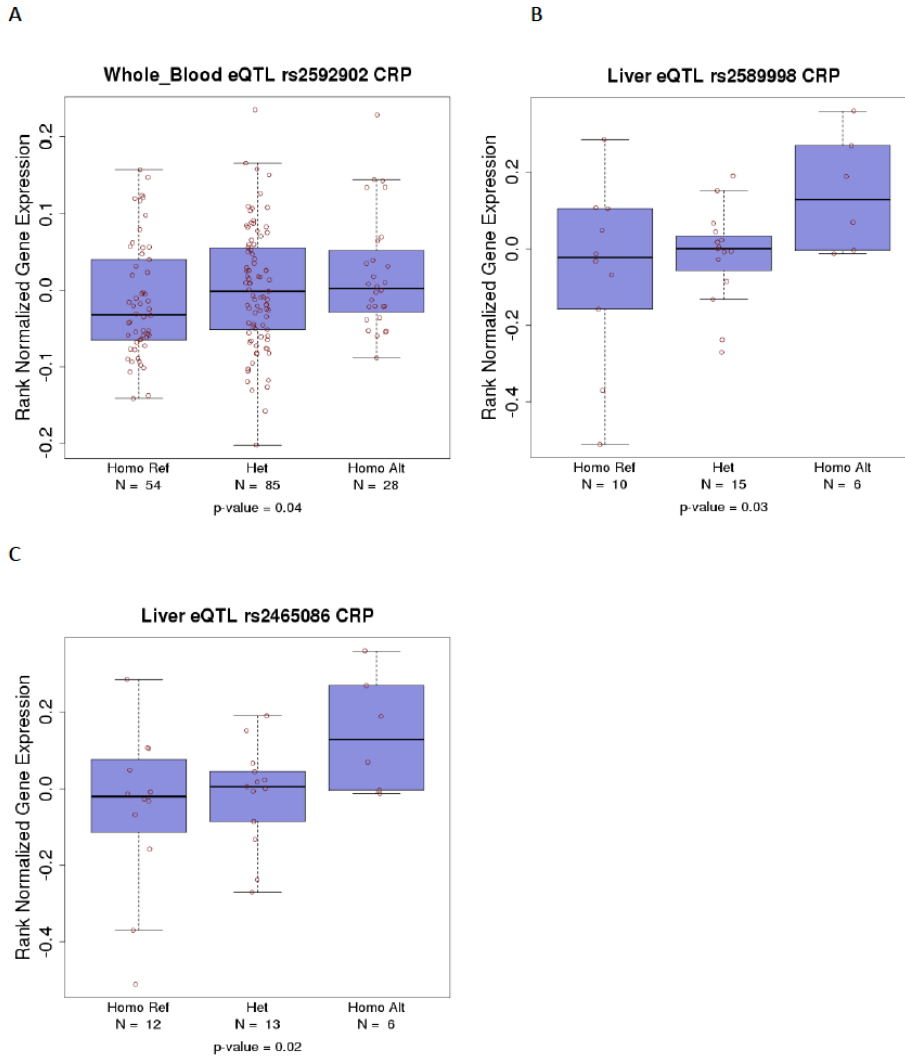

**eQTL analysis of circulating CRP associated SNPs with CRP gene expression.** Modified from GTEx v5. A) *CRP* SNP rs2592902. B-C) *AKR1D1* SNPs rs2589998 and rs2465086.
